# Supplementary material for: Hot-pressed CH3NH3PbI3 polycrystalline wafers for near-infrared bioimaging and medical X-ray imaging
Source: Royal Society of Chemistry journal article supplement (doi:10.1039/d3tc00760j), 2023-01-01
Supplement: d3tc00760j3.pdf [file d3tc00760j3.pdf]

Table S1. Sensitivity comparison of the reported X-ray detectors

| X-ray absorbing material                 | Sensitivity ( $\mu\text{C Gy}^{-1} \text{cm}^{-2}$ ) | Voltage/Electrical field ( $\text{V/V } \mu\text{m}^{-1}$ ) | Ref.      |
|------------------------------------------|------------------------------------------------------|-------------------------------------------------------------|-----------|
| $\alpha$ -Se                             | 440                                                  | NA/10-40                                                    | 16        |
| MAPbI <sub>3</sub> single crystal        | 6218                                                 | 13/NA                                                       | 14        |
| MAPbI <sub>3</sub> polycrystalline wafer | $1.2 \times 10^5$                                    | 10/NA                                                       | 12        |
| MAPbI <sub>3</sub> polycrystalline wafer | 2527                                                 | NA/0.2                                                      | 11        |
| MAPbI <sub>3</sub> polycrystalline wafer | 9300                                                 | NA/0.17                                                     | 13        |
| MAPbBr <sub>3</sub> single crystal       | $2.1 \times 10^4$                                    | 7/NA                                                        | 19        |
| FAPbI <sub>3</sub> single crystal        | $1.5 \times 10^5$                                    | 60/NA                                                       | 29        |
| MAPbI <sub>3</sub> polycrystalline wafer | $3.1 \times 10^5$                                    | 5 /0.025                                                    | This work |
