# Supplementary figures and images for: Hot-pressed CH3NH3PbI3 polycrystalline wafers for near-infrared bioimaging and medical X-ray imaging
Source: Royal Society of Chemistry journal article supplement (doi:10.1039/d3tc00760j), 2023-01-01

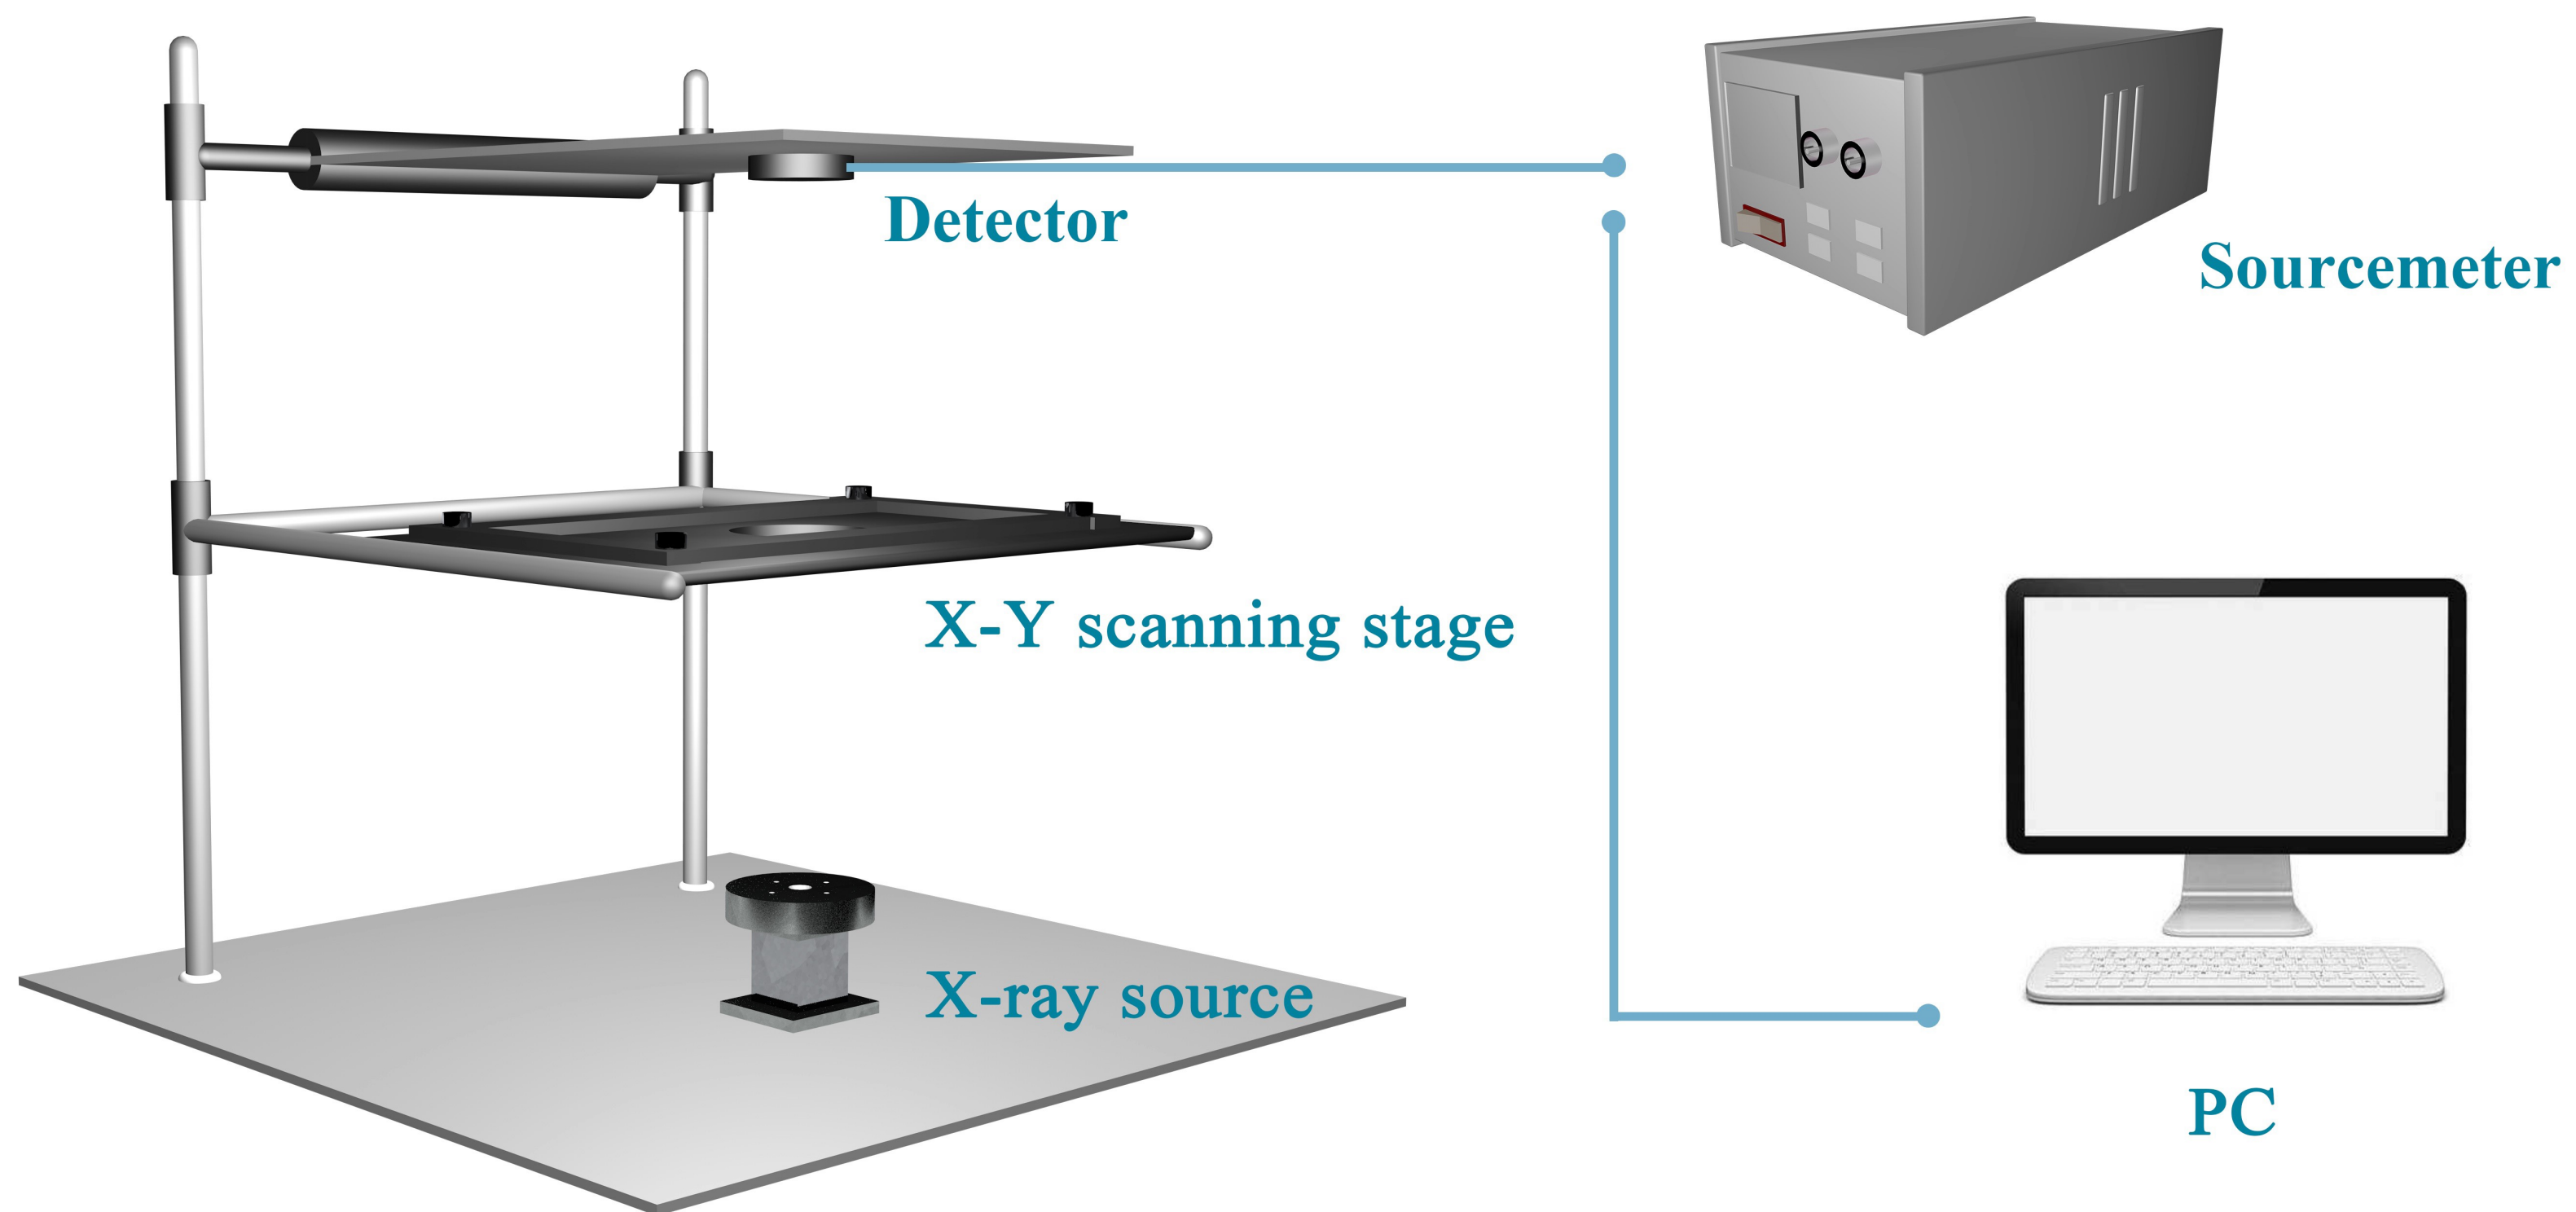

Supplement: d3tc00760j2.pdf [file d3tc00760j2.pdf]
